# Supplementary material for: COVID-19 Severity and Mortality in Two Pandemic Waves in Poland and Predictors of Poor Outcomes of SARS-CoV-2 Infection in Hospitalized Young Adults
Source: MDPI journal article supplement (doi:10.3390/v14081700), 2022-07-31
Supplement: s1 [file s1]

**Table S1.** Additional data on general and clinical patients' characteristics between the second and the third wave.

| Parameter                                                                         |                           | Total<br>(N=229) | Second wave<br>(N=75) | Third wave<br>(N=154) | p-value  |
|-----------------------------------------------------------------------------------|---------------------------|------------------|-----------------------|-----------------------|----------|
| BMI, ranges (N=154)                                                               | 18-24.9 kg/m <sup>2</sup> | 19 (12.34%)      | 5 (10.2%)             | 14 (13.33%)           | 0.774*   |
|                                                                                   | 25-29.9 kg/m <sup>2</sup> | 55 (35.71%)      | 16 (32.65%)           | 39 (37.14%)           | 0.718*   |
|                                                                                   | 30-34.9 kg/m <sup>2</sup> | 46 (29.87%)      | 16 (32.65%)           | 30 (28.57%)           | 0.744*   |
|                                                                                   | 35-39.9 kg/m <sup>2</sup> | 23 (14.94%)      | 6 (12.24%)            | 17 (16.19%)           | 0.691*   |
|                                                                                   | ≥ 40 kg/m <sup>2</sup>    | 11 (7.14%)       | 6 (12.24%)            | 5 (4.76%)             | 0.105*** |
| Smoking (N=164)                                                                   | Current                   | 13 (7.93%)       | 3 (5.26%)             | 10 (9.35%)            | 0.545*** |
|                                                                                   | Current or former         | 20 (12.2%)       | 6 (10.53%)            | 14 (13.08%)           | 0.821*   |
| Blood type (N=62)                                                                 | A Rh+                     | 18 (29.03%)      | 11 (30.56%)           | 7 (26.92%)            | 0.978*   |
|                                                                                   | A Rh-                     | 3 (4.84%)        | 2 (5.56%)             | 1 (3.85%)             | 1***     |
|                                                                                   | B Rh+                     | 12 (19.35%)      | 8 (22.22%)            | 4 (15.38%)            | 0.729*   |
|                                                                                   | B Rh-                     | 4 (6.45%)        | 3 (8.33%)             | 1 (3.85%)             | 0.633*** |
|                                                                                   | AB Rh+                    | 2 (3.23%)        | 1 (2.78%)             | 1 (3.85%)             | 1***     |
|                                                                                   | AB Rh-                    | 2 (3.23%)        | 1 (2.78%)             | 1 (3.85%)             | 1***     |
|                                                                                   | O Rh+                     | 20 (32.26%)      | 9 (25%)               | 11 (42.31%)           | 0.245*   |
|                                                                                   | O Rh-                     | 1 (1.61%)        | 1 (2.78%)             | 0 (0%)                | 1***     |
| Treatment                                                                         | Steroids                  | 222 (96.9%)      | 74 (98.7%)            | 148 (96.1%)           | 0.431*** |
|                                                                                   | Remdesivir                | 59 (25.8%)       | 19 (25.3%)            | 40 (26%)              | 0.955*   |
|                                                                                   | Tocilizumab               | 9 (3.9%)         | 3 (4%)                | 6 (3.9%)              | 1***     |
|                                                                                   | Antibiotics               | 166 (72.5%)      | 56 (74.7%)            | 110 (71.4%)           | 0.721*   |
|                                                                                   | Convalescent plasma       | 20 (8.7%)        | 7 (9.3%)              | 13 (8.4%)             | 0.980*   |
|                                                                                   | LMWH                      | 227 (99.1%)      | 75 (100%)             | 152 (98.7%)           | 0.815*   |
| SpO2 at admission,% (N=190)                                                       |                           | 90 (87-92)       | 89 (85.5-92)          | 90 (87-92)            | 0.641**  |
| Time from the onset of symptoms to hospital admission, days (N=229)               |                           | 8 (7-11)         | 8 (6-10)              | 9 (7-11)              | 0.074**  |
| Duration of hospitalization (excluding deceased), days (N=212)                    |                           | 10.5 (8-14)      | 11 (9-16)             | 10 (8-13.25)          | 0.036**  |
| Time from hospital admission to death (N=16)                                      |                           | 15 (8.75-27.25)  | 20 (14.5-24.75)       | 10 (7.25-30.75)       | 0.329**  |
| Conventional oxygen therapy (N=229)                                               |                           | 222 (96.94%)     | 73 (97.33%)           | 149 (96.75%)          | 1***     |
| Maximum flow – HFNO, l/min (N=55)                                                 |                           | 60 (57.5-60)     | 60 (55-61.25)         | 60 (60-60)            | 0.814**  |
| Maximum FiO2 – HFNO, % (N=55)                                                     |                           | 90 (83.5-95)     | 94.5 (87.5-95.25)     | 90 (83.5-95)          | 0.277**  |
| Extubation (N=22)                                                                 |                           | 6 (27.27%)       | 3 (27.27%)            | 3 (27.27%)            | 1***     |
| Duration of oxygen therapy (conventional/HFNO/invasive ventilation), days (N=206) |                           |                  | 8 (5-12)              | 6 (4-10)              | 0.814**  |
| ECMO (N=229)                                                                      |                           | 8 (3.49%)        | 4 (5.33%)             | 4 (2.6%)              | 0.444*** |
| Length of ICU stay (excluding deceased), days (N=16)                              |                           | 9 (6-18.25)      | 9 (6-25.5)            | 9 (6-16)              | 1**      |
| Time from the onset of symptoms to ICU admission, days (N=31)                     |                           | 10 (8.5-13)      | 10 (8-13)             | 10 (9-13)             | 0.524**  |
| Vasopressors (N=229)                                                              |                           | 21 (9.17%)       | 11 (14.67%)           | 10 (6.49%)            | 0.077*   |
| CRRT (N=229)                                                                      |                           | 5 (2.18%)        | 3 (4%)                | 2 (1.3%)              | 0.334**  |

w/o – without outliers; \* - Chi-squared with Yates correction; \*\* - Mann-Whitney U test; \*\*\* - Fisher's exact test. Continuous variables are presented as median (IQR), categorical variables are presented as N (%).

LMWH – Low molecular-weight heparin, CRRT - continuous renal replacement therapy.

**Table S2.** Additional data on comparison of patients' laboratory parameters (as continuous variables) between the second and the third wave.

| Parameter                                                   | Total<br>(N=229)      | Second wave<br>(N=75)                    | Third wave<br>(N=154)                | p-value*          |
|-------------------------------------------------------------|-----------------------|------------------------------------------|--------------------------------------|-------------------|
| RBC count - at admission, $\times 10^6/\mu\text{L}$ (N=227) | 4.79 (4.54-5.05)      | 4.78 (4.46-5.06)<br>(w/o median 4.8)     | 4.79 (4.59-5.05)                     | 0.761 (w/o 0.835) |
| RBC count - 7. DOH, $\times 10^6/\mu\text{L}$ (N=187)       | 4.72 (4.45-5.04)      | 4.62 (4.37-4.99)<br>(w/o median 4.67)    | 4.75 (4.5-5.09)                      | 0.246 (w/o 0.321) |
| Hemoglobin - at admission, g/dL (N=227)                     | 14.3 (13.45-15.1)     | 14.3 (13.35-15.25)                       | 14.35 (13.6-15.03)                   | 0.818 (w/o 0.813) |
| Hemoglobin - 7. DOH, g/dL (N=187)                           | 14 (13-15)            | 13.95 (12.8-14.8)                        | 14.1 (13.2-15.2)                     | 0.239             |
| Hematocrit - at admission, % (N=227)                        | 41.6 (39.35-44.05)    | 41.2 (39.2-44)                           | 41.7 (39.68-44.03)                   | 0.375 (w/o 0.417) |
| Hematocrit - 7. DOH, % (N=187)                              | 41.7 (38.5-44.6)      | 41.25 (37.3-44.25)                       | 41.9 (39.4-44.6)                     | 0.094 (w/o 0.128) |
| Ferritin - at admission, ng/mL (N=61)                       | 1160 (487-1562)       | 1160 (725.5-1386)                        | 1159 (470.5-1567.25)                 | 0.802 (w/o 0.947) |
| Ferritin - 7. DOH, ng/mL (N=31)                             | 951 (438-1394)        | 920 (585.75-1484.5)                      | 951 (438-1323.5)                     | 0.740             |
| IL-6 - at admission, ng/mL (N=116)                          | 20.75 (7.2-56.6)      | 18.8 (8.22-45)                           | 20.8 (5.56-65.2)                     | 0.622             |
| IL-6 - 7. DOH, ng/mL (N=53)                                 | 9.1 (4.23-21.8)       | 9.19 (6.11-22.2)                         | 8.45 (2.34-21.05)                    | 0.426             |
| AT III - at admission, % (N=17)                             | 95 (85-101)           | 93 (76.5-97)                             | 102.5 (95-128)                       | 0.159             |
| AT III - 7. DOH, % (N=10)                                   | 93 (90.25-108)        | 91 (82-94.75)                            | 109 (93.75-123)                      | 0.238             |
| Fibrinogen - at admission, mg/dL (N=62)                     | 598 (467-728.25)      | 646 (510-773)                            | 585 (466-683)                        | 0.278 (w/o 0.191) |
| Fibrinogen - 7. DOH, mg/dL (N=39)                           | 486 (386-578)         | 532.5 (385.5-619.75)                     | 477 (410-557)                        | 0.548             |
| LDH - at admission, U/L (N=172)                             | 410 (313-554)         | 380 (292.25-530.75)                      | 419.5 (324.75-575)                   | 0.178             |
| LDH - 7. DOH, U/L (N=46)                                    | 389.5 (256.75-447.25) | 397 (353-529.75)                         | 368.5 (243.5-434.5)                  | 0.181             |
| hs-TnI - at admission, pg/mL (N=153)                        | 3.4 (3.2-7.9)         | 3.9 (2.55-7.35)                          | 3.2 (3.2-7.83)                       | 0.667             |
| hs-TnI - 7. DOH, pg/mL (N=40)                               | 3.2 (2.28-22.1)       | 2.45 (1.08-23.1)                         | 3.2 (3.2-13.25)                      | 0.244             |
| CK - at admission, U/L (N=142)                              | 250.5 (114-457)       | 207.5 (88.5-465.75)                      | 256.5 (134-452.25)                   | 0.268             |
| CK - 7. DOH, U/L (N=38)                                     | 69.5 (35.25-197)      | 83.5 (25.75-225)                         | 67.5 (36.75-129.25)                  | 0.745             |
| CK-MB - at admission, U/L (N=124)                           | 19 (15-25)            | 19 (15-22)                               | 18 (15-27)                           | 0.998             |
| CK-MB - 7. DOH, U/L (N=27)                                  | 18 (13.5-30.5)        | 20 (13.5-30)                             | 15 (14-36)                           | 0.865             |
| NT-proBNP - at admission, pg/mL (N=142)                     | 101.5 (43-192.75)     | 116.5 (49-234.75)                        | 100.6 (40.75-178.25)                 | 0.524             |
| NT-proBNP - 7. DOH, pg/mL (N=42)                            | 147 (57.75-264.25)    | 208.5 (66.5-272)                         | 119 (65.25-218.25)                   | 0.247             |
| Myoglobin - at admission, ng/mL (N=15)                      | 118 (54.5-1459)       | 60 (48-218)                              | 1459 (430.75-2579.5)                 | 0.078             |
| Myoglobin - 7. DOH, ng/mL (N=11)                            | 150 (37-277)          | 125 (28-248)                             | 811 (578-1044)                       | 0.034             |
| Creatinine - at admission, mg/dL (N=222)                    | 0.9 (0.78-1.04)       | 0.92 (0.79-1.06)                         | 0.89 (0.77-1.03)                     | 0.301 (w/o 0.170) |
| Creatinine - 7. DOH, mg/dL (N=169)                          | 0.82 (0.71-0.91)      | 0.83 (0.73-0.91)                         | 0.81 (0.71-0.92)                     | 0.634 (w/o 0.840) |
| EGFR - at admission, mL/min (N=215)                         | 90 (77-103)           | 88 (77-102)                              | 91 (77.25-103)<br>(w/o median 90.16) | 0.489 (w/o 0.594) |
| EGFR - 7. DOH, mL/min (N=169)                               | 101 (89-118)          | 100.5 (88.5-122.5)<br>(w/o median 101.5) | 102 (89-115)                         | 0.815 (w/o 0.854) |
| Urea - at admission, mg/dL (N=209)                          | 28 (22-36)            | 29.5 (23.75-37)                          | 26 (21.35)                           | 0.174 (w/o 0.107) |
| Urea - 7. DOH, mg/dL (N=124)                                | 33 (28-40)            | 35.5 (28.5-52.5)<br>(w/o median 35.29)   | 32 (27.25-39.75)                     | 0.170 (w/o 0.164) |
| ALT - at admission, U/L (N=226)                             | 47 (32.25-68.75)      | 45 (34-62.5)                             | 48 (32-72.5)                         | 0.506 (w/o 0.574) |
| ALT - 7. DOH, U/L (N=150)                                   | 95 (55-68.75)         | 118 (55-174)                             | 90 (55-140)                          | 0.224             |
| AST - at admission, U/L (N=219)                             | 48 (35-71.4)          | 45 (33.5-73)                             | 49.5 (36.78-72.25)                   | 0.142 (w/o 0.155) |
| AST - 7. DOH, U/L (N=148)                                   | 45 (30-69.25)         | 54 (36-71)                               | 41 (29-64.5)                         | 0.181             |
| GGT - at admission, U/L (N=58)                              | 68 (43-152)           | 92 (46-120.75)                           | 62 (40-152)                          | 0.972             |
| GGT - 7. DOH, U/L (N=41)                                    | 112 (58-192)          | 160 (57-208)                             | 93.5 (58-160)                        | 0.408             |
| Total bilirubin - at admission, mg/dL (N=165)               | 0.43 (0.32-0.57)      | 0.41 (0.32-0.54)                         | 0.44 (0.33-0.58)                     | 0.440             |
| Total bilirubin - 7. DOH, mg/dL (N=63)                      | 0.42 (0.3-0.6)        | 0.41 (0.28-0.59)                         | 0.43 (0.3-0.6)                       | 0.605             |
| Total calcium - at admission, mmol/L (N=42)                 | 2.14 (2.04-2.23)      | 2.13 (2.07-2.19)                         | 2.14 (2.04-2.23)                     | 0.959             |
| Total calcium - 7. DOH, mmol/L (N=34)                       | 2.23 (2.1-2.28)       | 2.18 (2.08-2.28)                         | 2.23 (2.1-2.28)                      | 0.743             |
| Vitamin D3 - at admission, ng/mL (N=81)                     | 26.9 (19.5-33.8)      | 26.8 (19.75-31.53)                       | 27.7 (19.5-39.2)                     | 0.797 (w/o 0.894) |
| Vitamin D3 - 7. DOH, ng/mL (N=6)                            | 22.45 (16.7-35.4)     | -                                        | 22.45 (16.7-35.4)                    | -                 |

\*- Mann-Whitney U test; w/o – without outliers. All variables are presented as median (IQR).

**Table S3.** Comparison of patients' laboratory parameters (as categorical variables) between the second and the third wave.

| Parameter                                           |                              | Total<br>(N=229) | Second<br>wave (N=75) | Third wave<br>(N=154) | p-value |
|-----------------------------------------------------|------------------------------|------------------|-----------------------|-----------------------|---------|
| WBC ranges - at admission (N=227)                   | < 4.5 ×10 <sup>3</sup> /μL   | 54 (23.79%)      | 12 (16%)              | 42 (27.63%)           | 0.077*  |
|                                                     | 4.5-10 ×10 <sup>3</sup> /μL  | 139 (61.23%)     | 42 (56%)              | 97 (63.82%)           | 0.321*  |
|                                                     | >10 ×10 <sup>3</sup> /μL     | 34 (14.98%)      | 21 (28%)              | 13 (8.55%)            | <0.001* |
| WBC ranges – 7. DOH (N=187)                         | < 4.5 ×10 <sup>3</sup> /μL   | 7 (3.74%)        | 4 (6.45%)             | 3 (2.4%)              | 0.223** |
|                                                     | 4.5-10 ×10 <sup>3</sup> /μL  | 122 (65.24%)     | 37 (59.68%)           | 85 (68%)              | 0.336*  |
|                                                     | >10 ×10 <sup>3</sup> /μL     | 58 (31.02%)      | 21 (33.87%)           | 37 (29.6%)            | 0.670*  |
| Neutrophil count ranges - at admission (N=226)      | < 1.9 ×10 <sup>3</sup> /μL   | 13 (5.75%)       | 2 (2.67%)             | 11 (7.28%)            | 0.229** |
|                                                     | 1.9-7 ×10 <sup>3</sup> /μL   | 160 (70.8%)      | 45 (60%)              | 115 (76.16%)          | 0.018*  |
|                                                     | >7 ×10 <sup>3</sup> /μL      | 53 (23.45%)      | 28 (37.33%)           | 25 (16.56%)           | 0.001*  |
| Neutrophil count ranges - 7. DOH (N=187)            | < 1.9 ×10 <sup>3</sup> /μL   | 5 (2.69%)        | 3 (4.92%)             | 2 (1.6%)              | 0.333** |
|                                                     | 1.9-7 ×10 <sup>3</sup> /μL   | 127 (68.28%)     | 40 (65.57%)           | 87 (69.6%)            | 0.600*  |
|                                                     | >7 ×10 <sup>3</sup> /μL      | 54 (29.03%)      | 18 (29.51%)           | 36 (28.8%)            | 1*      |
| Neutrophil percentage ranges - at admission (N=226) | < 40%                        | 1 (0.44%)        | 0 (0%)                | 1 (0.66%)             | 1**     |
|                                                     | 40-68%                       | 62 (27.43%)      | 16 (21.33%)           | 46 (30.46%)           | 0.197*  |
|                                                     | >68%                         | 163 (72.12%)     | 59 (78.67%)           | 104 (68.87%)          | 0.165*  |
| Neutrophil percentage ranges - 7. DOH (N=186)       | < 40%                        | 7 (3.76%)        | 2 (3.28%)             | 5 (4%)                | 1**     |
|                                                     | 40-68%                       | 113 (60.75%)     | 39 (63.93%)           | 74 (59.2%)            | 0.645*  |
|                                                     | >68%                         | 66 (35.48%)      | 20 (32.79%)           | 46 (36.8%)            | 0.709*  |
| Lymphocyte count ranges - at admission (N=226)      | < 0.9 ×10 <sup>3</sup> /μL   | 103 (45.58%)     | 34 (45.33%)           | 69 (45.7%)            | 1*      |
|                                                     | 0.9-5 ×10 <sup>3</sup> /μL   | 123 (54.42%)     | 41 (54.67%)           | 82 (54.3%)            | 1*      |
|                                                     | >5 ×10 <sup>3</sup> /μL      | 0                | 0                     | 0                     | -       |
| Lymphocyte count ranges - 7. DOH, N(%); (N=186)     | < 0.9 ×10 <sup>3</sup> /μL   | 19 (10.22%)      | 8 (13.11%)            | 11 (8.8%)             | 0.513*  |
|                                                     | 0.9-5 ×10 <sup>3</sup> /μL   | 165 (88.71%)     | 53 (86.89%)           | 112 (89.6%)           | 0.762*  |
|                                                     | >5 ×10 <sup>3</sup> /μL      | 2 (1.08%)        | 0 (0%)                | 2 (1.6%)              | 1**     |
| Lymphocyte percentage ranges - at admission (N=226) | < 19%                        | 138 (61.06%)     | 51 (68%)              | 87 (57.62%)           | 0.173*  |
|                                                     | 19-48%                       | 87 (38.5%)       | 23 (30.67%)           | 64 (42.38%)           | 0.119*  |
|                                                     | >48%                         | 1 (0.44%)        | 1 (1.33%)             | 0 (0%)                | 0.332** |
| Lymphocyte percentage ranges- 7. DOH (N=186)        | < 19%                        | 64 (34.41%)      | 22 (36.07%)           | 42 (33.6%)            | 0.867*  |
|                                                     | 19-48%                       | 118 (63.44%)     | 37 (60.66%)           | 81 (64.8%)            | 0.697*  |
|                                                     | >48%                         | 4 (2.15%)        | 2 (3.28%)             | 2 (1.6%)              | 0.599** |
| PLT ranges- at admission (N=227)                    | < 150 ×10 <sup>3</sup> /μL   | 41 (18.06%)      | 11 (14.67%)           | 30 (19.74%)           | 0.453*  |
|                                                     | 150-400 ×10 <sup>3</sup> /μL | 171 (75.33%)     | 58 (77.33%)           | 113 (74.34%)          | 0.743*  |
|                                                     | >400 ×10 <sup>3</sup> /μL    | 15 (6.61%)       | 6 (8%)                | 9 (5.92%)             | 0.757*  |
| PLT ranges – 7. DOH (N=187)                         | < 150 ×10 <sup>3</sup> /μL   | 2 (1.07%)        | 1 (1.61%)             | 1 (0.8%)              | 1**     |
|                                                     | 150-400 ×10 <sup>3</sup> /μL | 93 (49.73%)      | 31 (50%)              | 62 (49.6%)            | 1*      |
|                                                     | >400 ×10 <sup>3</sup> /μL    | 92 (49.2%)       | 30 (48.39%)           | 62 (49.6%)            | 0.999*  |
| NLR ≥2 - at admission (N=226)                       |                              | 206 (91.15%)     | 69 (92%)              | 137 (90.73%)          | 0.946*  |
| NLR ≥2- 7. DOH (N=186)                              |                              | 118 (63.44%)     | 43 (70.49%)           | 75 (60%)              | 0.218*  |
| CRP ≥100 mg/L - at admission (N=222)                |                              | 82 (36.94%)      | 33 (44%)              | 49 (33.33%)           | 0.158*  |
| CRP ≥100 mg/L - 7. DOH (N=187)                      |                              | 9 (4.97%)        | 6 (10.17%)            | 3 (2.46%)             | 0.060** |
| PCT > 0.5 ng/mL – at admission; (N=205)             |                              | 22 (10.73%)      | 10 (14.08%)           | 12 (8.96%)            | 0.372*  |
| PCT > 0.5 ng/mL – 7. DOH; (N=102)                   |                              | 10 (9.8%)        | 5 (14.71%)            | 5 (7.35%)             | 0.295** |
| D-Dimer > 500 μg/L FEU - at admission; (N=206)      |                              | 154 (74.76%)     | 47 (83.93%)           | 107 (71.33%)          | 0.095*  |
| D-Dimer > 500 μg/L FEU – 7. DOH (N=150)             |                              | 121 (80.67%)     | 34 (97.14%)           | 87 (75.65%)           | 0.003** |
| LDH >500 U/L – at admission (N=172)                 |                              | 54 (31.4%)       | 17 (28.33%)           | 37 (33.04%)           | 0.645*  |
| LDH >500 U/L – 7. DOH (N=46)                        |                              | 10 (21.74%)      | 4 (28.57%)            | 6 (18.75%)            | 0.723** |

\* - Chi-squared with Yates correction; \*\* - Fisher's exact test. All variables are presented as N (%).

**Table S4.** Additional data on comparison of general patients' characteristics between survivors and non-survivors.

|                     | Parameter | Survivors<br>(N=213) | Non-survivors<br>(N=16) | p-value  |
|---------------------|-----------|----------------------|-------------------------|----------|
| BMI, ranges (N=154) | <25       | 18 (12.95%)          | 1 (6.67%)               | 0.696*   |
|                     | 25-29.9   | 52 (37.41%)          | 3 (20%)                 | 0.292*   |
|                     | 30-34.9   | 41 (29.5%)           | 5 (33.33%)              | 0.771*   |
|                     | 35-39.9   | 20 (14.39%)          | 3 (20%)                 | 0.472*   |
|                     | ≥ 40      | 8 (5.76%)            | 3 (20%)                 | 0.077*** |
| Blood type (N=62)   | A Rh+     | 12 (25%)             | 6 (42.86%)              | 0.315*   |
|                     | A Rh-     | 3(6.25%)             | 0 (0%)                  | 1***     |
|                     | B Rh+     | 11 (22.92%)          | 1 (7.14%)               | 0.267*   |
|                     | B Rh-     | 2 (4.17%)            | 2 (14.29%)              | 0.217*** |
|                     | AB Rh+    | 2 (4.17%)            | 0 (0%)                  | 1***     |
|                     | AB Rh-    | 2 (4.17%)            | 0 (0%)                  | 1***     |
|                     | O Rh+     | 15 (31.25%)          | 5 (35.71%)              | 0.755*   |
|                     | O Rh-     | 1 (2.08%)            | 0 (0%)                  | 1***     |

\* - Chi-squared with Yates correction; \*\* - Mann-Whitney U test; \*\*\* - Fisher's exact test. Continuous variables are presented as median (IQR), categorical variables are presented as N (%).

**Table S5.** The correlations between patients' general and clinical characteristics (categorical variables) and the need for mechanical ventilation and ICU treatment.

| Parameter                                |                                      | Mechanical ventilation |             |      |          | ICU treatment |             |      |          |
|------------------------------------------|--------------------------------------|------------------------|-------------|------|----------|---------------|-------------|------|----------|
|                                          |                                      | no                     | yes         | phi  | p        | no            | yes         | phi  | p        |
| Sex (N=229)                              | female                               | 51 (24.64%)            | 6 (27.27%)  | 0.02 | 0.990*   | 50 (25.25%)   | 7 (22.58%)  | 0.02 | 0.923*   |
|                                          | male                                 | 156 (75.36%)           | 16 (72.73%) |      |          | 148 (74.75%)  | 24 (77.42%) |      |          |
| BMI, ranges (N=154)                      | 18-24.9 kg/m <sup>2</sup>            | 18 (13.53%)            | 1 (4.76%)   | 0.09 | 0.474**  | 18 (14.17%)   | 1 (3.7%)    | 0.12 | 0.199**  |
|                                          | 25-29.9 kg/m <sup>2</sup>            | 50 (37.59%)            | 5 (23.81%)  | 0.1  | 0.327**  | 47 (37.01%)   | 8 (29.63%)  | 0.06 | 0.613*   |
|                                          | 30-34.9 kg/m <sup>2</sup>            | 40 (30.08%)            | 6 (28.57%)  | 0.01 | 1*       | 38 (29.92%)   | 8 (29.63%)  | 0    | 1*       |
|                                          | 35-39.9 kg/m <sup>2</sup>            | 18 (13.53%)            | 5 (23.81%)  | 0.1  | 0.318**  | 17 (13.39%)   | 6 (22.22%)  | 0.09 | 0.244**  |
|                                          | ≥ 40 kg/m <sup>2</sup>               | 7 (5.26%)              | 4 (19.05%)  | 0.18 | 0.045**  | 7 (5.51%)     | 4 (14.81%)  | 0.14 | 0.103**  |
| Comorbidities (N=229)                    | Comorbidities (any of the following) | 79 (38.16%)            | 14 (63.64%) | 0.15 | 0.037*   | 76 (38.38%)   | 17 (54.84%) | 0.11 | 0.124*   |
|                                          | Hypertension                         | 30 (14.49%)            | 4 (18.18%)  | 0.03 | 0.751**  | 28 (14.14%)   | 6 (19.35%)  | 0.05 | 0.423**  |
|                                          | Asthma                               | 17 (8.21%)             | 1 (4.55%)   | 0.04 | 1**      | 15 (7.58%)    | 3 (9.68%)   | 0.03 | 0.718**  |
|                                          | Chronic arrhythmia                   | 3 (1.45%)              | 2 (9.09%)   | 0.15 | 0.074**  | 4 (2.02%)     | 1 (3.23%)   | 0.03 | 0.520**  |
|                                          | Diabetes                             | 13 (6.28%)             | 5 (22.73%)  | 0.18 | 0.019**  | 11 (5.56%)    | 7 (22.58%)  | 0.22 | 0.005**  |
|                                          | Insulin resistance                   | 4 (1.93%)              | 2 (.09%)    | 0.13 | 0.104**  | 4 (2.02%)     | 2 (6.45%)   | 0.09 | 0.188**  |
|                                          | Dyslipidemia                         | 5 (2.42%)              | 1 (4.55%)   | 0.04 | 0.458**  | 5 (2.53%)     | 1 (3.23%)   | 0.02 | 0.587**  |
|                                          | Hypothyroidism                       | 8 (3.86%)              | 1 (4.55%)   | 0.01 | 0.604**  | 7 (3.54%)     | 2 (6.45%)   | 0.05 | 0.350**  |
| Smoking (N=164)                          | Hashimoto disease                    | 7 (3.38%)              | 0 (0%)      | 0.06 | 1**      | 6 (3.03%)     | 1 (3.23%)   | 0    | 1**      |
|                                          | Current                              | 10 (6.58%)             | 3 (25%)     | 0.18 | 0.057**  | 9 (6.12%)     | 4 (23.53%)  | 0.2  | 0.032**  |
| Symptoms (N=229)                         | Current or former                    | 15 (9.87%)             | 5 (41.67%)  | 0.25 | 0.007**  | 14 (9.52%)    | 6 (35.29%)  | 0.24 | 0.008**  |
|                                          | Dyspnea                              | 189 (91.3%)            | 21 (95.45%) | 0.04 | 1**      | 181 (91.41)   | 29 (93.55%) | 0.03 | 1        |
|                                          | Fever                                | 182 (87.92%)           | 13 (59.09%) | 0.24 | 0.002**  | 174 (87.88%)  | 21 (67.74%) | 0.19 | 0.011**  |
|                                          | Cough                                | 180 (86.96%)           | 15 (68.18%) | 0.16 | 0.028**  | 173 (87.37%)  | 22 (70.97%) | 0.16 | 0.027**  |
|                                          | Fatigue                              | 121 (58.45%)           | 9 (40.91%)  | 0.1  | 0.176*   | 116 (58.59%)  | 14 (45.16%) | 0.09 | 0.227*   |
|                                          | Diarrhea                             | 40 (19.32%)            | 1 (4.55%)   | 0.11 | 0.139**  | 40 (20.2%)    | 1 (3.23%)   | 0.15 | 0.041*   |
|                                          | Nausea or vomiting                   | 25 (12.08%)            | 2 (9.09%)   | 0.03 | 1**      | 26 (13.13%)   | 1 (3.23%)   | 0.11 | 0.140**  |
|                                          | Myalgia                              | 64 (30.92%)            | 3 (13.64%)  | 0.11 | 0.148**  | 61 (30.81%)   | 6 (19.35%)  | 0.09 | 0.275*   |
|                                          | Sore throat                          | 16 (7.73%)             | 2 (.09%)    | 0.01 | 0.686**  | 16 (8.08%)    | 2 (6.45%)   | 0.02 | 1**      |
|                                          | Headache                             | 41 (19.81%)            | 1 (4.55%)   | 0.12 | 0.088**  | 39 (19.7%)    | 3 (9.68%)   | 0.09 | 0.275*   |
|                                          | Smell and/or taste disorders         | 40 (19.32%)            | 3 (13.64%)  | 0.04 | 0.774**  | 38 (19.19%)   | 5 (16.13%)  | 0.03 | 0.874*   |
|                                          | Smell disorders                      | 34 (16.43%)            | 3 (13.64%)  | 0.02 | 1**      | 32 (16.16%)   | 5 (16.13%)  | 0    | 1*       |
|                                          | Taste disorders                      | 34 (16.43%)            | 3 (13.64%)  | 0.02 | 1**      | 32 (16.16%)   | 5 (16.13%)  | 0    | 1*       |
|                                          | Hemoptysis                           | 7 (3.38%)              | 1 (4.55%)   | 0.02 | 0.560**  | 6 (3.03%)     | 2 (6.45%)   | 0.06 | 0.296*   |
| Lung involvement on CT ≥ 50% (%) (N=207) |                                      | 38 (20.11%)            | 13 (72.22%) | 0.34 | <0.001** | 35 (19.13%)   | 16 (66.67%) | 0.35 | <0.001*  |
| SpO2 at admission <90% (N=190)           |                                      | 77 (44%)               | 11 (73.33%) | 0.16 | 0.055*   | 74 (43.53%)   | 14 (70%)    | 0.16 | 0.045*   |
| Conventional oxygen therapy (N=229)      |                                      | 200 (96.62%)           | 22 (100%)   | 0.06 | 1**      | 191 (96.46%)  | 31 (100%)   | 0.07 | 0.598**  |
| HFNO (N=229)                             |                                      | 36 (17.39%)            | 19 (86.36%) | 0.48 | <0.001*  | 29 (14.65%)   | 26 (83.87%) | 0.55 | <0.001*  |
| Mechanical ventilation (N=229)           |                                      | -                      | -           | -    | -        | 1 (0.51%)     | 21 (67.74%) | 0.78 | <0.001** |
| ECMO (N=229)                             |                                      | 5 (2.42%)              | 3 (13.64%)  | 0.18 | 0.032**  | 6 (3.03%)     | 2 (6.45%)   | 0.06 | 0.296**  |
| ICU admission (N=229)                    |                                      | 10 (4.83%)             | 21 (95.45%) | 0.78 | <0.001** | -             | -           | -    | -        |
| Vasopressors (N=229)                     |                                      | 0 (0%)                 | 21 (95.45%) | 0.97 | <0.001** | 1 (0.51%)     | 20 (64.52%) | 0.76 | <0.001** |
| CRRT (N=229)                             |                                      | 0 (0%)                 | 5 (22.73%)  | 0.46 | <0.001** | 0 (0%)        | 5 (16.13%)  | 0.38 | <0.001** |

\* chi-squared test with Yates' correction; \*\* Fisher's exact test; All variables are presented as N (%).

**Table S6.** The correlations between patients' general and clinical characteristics and laboratory parameters (presented as continuous variables) and the need for mechanical ventilation and ICU treatment.

| Parameter                                     | Mechanical ventilation |                    | ICU treatment     |                    |
|-----------------------------------------------|------------------------|--------------------|-------------------|--------------------|
|                                               | rho                    | p-value*           | rho               | p-value*           |
| Age (N=229)                                   | 0.12                   | 0.066              | 0.04              | 0.592              |
| Weight (N=160)                                | 0.19 (w/o 0.17)        | 0.016 (w/o 0.033)  | 0.14 (w/o 0.12)   | 0.076 (w/o 0.120)  |
| BMI (N=154)                                   | 0.21 (w/o 0.17)        | 0.009 (w/o 0.040)  | 0.19 (w/o 0.16)   | 0.017 (w/o 0.054)  |
| Percentage of lung involvement on CT (N=207)  | 0.35                   | <0.001             | 0.36              | <0.001             |
| SpO2 at admission (N=190)                     | 0.25 (w/o 0.15)        | <0.001 (w/o 0.034) | -0.2 (w/o 0.16)   | <0.001 (w/o 0.026) |
| WBC - at admission (N=227)                    | 0.26                   | <0.001             | 0.28              | <0.001             |
| WBC - 7. DOH (N=187)                          | 0.32 (w/o 0.28)        | <0.001             | 0.25 (w/o 0.22)   | <0.001 (w/o 0.003) |
| Neutrophil count - at admission (N=226)       | 0.27                   | <0.001             | 0.3               | <0.001             |
| Neutrophil count - 7. DOH (N=186)             | 0.39 (w/o 0.38)        | <0.001             | 0.36              | <0.001             |
| Neutrophil percentage - at admission (N=226)  | 0.2                    | 0.002 (w/o 0.003)  | 0.27              | <0.001             |
| Neutrophil percentage - 7. DOH (N=186)        | 0.34                   | <0.001             | 0.39              | <0.001             |
| Lymphocyte count - at admission (N=226)       | 0.01 (w/o 0.02)        | 0.898 (w/o 0.821)  | 0.08 (w/o 0.07)   | 0.237 (w/o 0.276)  |
| Lymphocyte count - 7. DOH (N=186)             | -0.25                  | <0.001 (w/o 0.001) | -0.33             | <0.001             |
| Lymphocyte percentage - at admission (N=226)  | -0.24 (w/o 0.23)       | <0.001             | -0.31             | <0.001             |
| Lymphocyte percentage - 7. DOH (N=186)        | -0.43                  | <0.001             | -0.46             | <0.001             |
| NLR - at admission (N=226)                    | 0.23                   | <0.001 (w/o 0.001) | 0.3 (w/o 0.31)    | <0.001             |
| NLR - 7. DOH (N=186)                          | 0.42 (w/o 0.39)        | <0.001             | 0.45 (w/o 0.43)   | <0.001             |
| IG count - at admission (N=217)               | 0.32 (w/o 0.30)        | <0.001             | 0.35 (w/o 0.32)   | <0.001             |
| IG count - 7. DOH (N=186)                     | 0.29 (w/o 0.21)        | <0.001 (w/o 0.005) | 0.20 (w/o 0.13)   | 0.007 (w/o 0.068)  |
| IG percentage - at admission (N=217)          | 0.33 (w/o 0.29)        | <0.001             | 0.37 (w/o 0.33)   | <0.001             |
| IG percentage - 7. DOH (N=186)                | 0.24 (w/o 0.18)        | <0.001 (w/o 0.016) | 0.16 (w/o 0.11)   | 0.028 (w/o 0.137)  |
| RBC count - at admission (N=227)              | 0.06                   | 0.363 (w/o 0.400)  | 0.05              | 0.420 (w/o 0.473)  |
| RBC count - 7. DOH (N=187)                    | -0.41 (w/o -0.42)      | <0.001             | -0.34             | <0.001             |
| hemoglobin - at admission to hospital (N=227) | 0.01                   | 0.830 (w/o 0.923)  | -0.01 (w/o -0.02) | 0.929 (w/o 0.818)  |
| hemoglobin - 7. DOH (N=187)                   | -0.42                  | <0.001             | -0.33             | <0.001             |
| hematocrit - at admission (N=227)             | 0.05                   | 0.435 (w/o 0.472)  | 0.04              | 0.537 (w/o 0.592)  |
| hematocrit - 7. DOH (N=187)                   | -0.36 (w/o -0.37)      | <0.001             | -0.29 (w/o -0.30) | <0.001             |
| PLT - at admission to hospital (N=227)        | 0.14 (w/o 0.15)        | 0.038 (w/o 0.025)  | 0.19 (w/o 0.17)   | 0.003 (w/o 0.012)  |
| PLT - 7. DOH (N=187)                          | -0.04 (w/o -0.01)      | 0.573 (w/o 0.911)  | -0.03 (w/o 0)     | 0.683 (w/o 0.975)  |
| CRP - at admission (N=222)                    | 0.29 (w/o 0.3)         | <0.001             | 0.28 (w/o 0.27)   | <0.001             |
| CRP - 7. DOH (N=181)                          | 0.48 (w/o 0.43)        | <0.001             | 0.51 (w/o 0.48)   | <0.001             |
| Ferritin - at admission (N=61)                | 0.29 (w/o 0.3)         | 0.025 (w/o 0.018)  | 0.22 (w/o 0.24)   | 0.093 (w/o 0.068)  |
| Ferritin - 7. DOH (N=31)                      | 0.12                   | 0.529              | 0.38              | 0.037              |
| IL-6 - at admission (N=116)                   | 0.18                   | 0.049              | 0.11              | 0.236              |
| IL-6 - 7. DOH (N=53)                          | 0.33                   | 0.015              | 0.43              | 0.001              |
| AT III - at admission (N=17)                  | 0.16                   | 0.542              | 0.12              | 0.650              |
| AT III - 7. DOH (N=10)                        | -0.29                  | 0.413              | -0.29             | 0.413              |
| PCT - at admission (N=205)                    | 0.38 (w/o 0.039)       | <0.001             | 0.37 (w/o 0.39)   | <0.001             |
| PCT - 7. DOH (N=102)                          | 0.56                   | <0.001             | 0.61              | <0.001             |
| D-Dimer - at admission (N=206)                | 0.24                   | <0.001 (w/o 0.001) | 0.27              | <0.001             |
| D-Dimer - 7. DOH (N=150)                      | 0.36                   | <0.001             | 0.36              | <0.001             |
| PT - at admission (N=198)                     | 0.03 (w/o -0.02)       | 0.672 (w/o 0.812)  | 0.12 (w/o 0.11)   | 0.093 (w/o 0.126)  |
| PT - 7. DOH (N=80)                            | 0.17 (w/o 0.18)        | 0.139 (w/o 0.113)  | 0.26 (w/o 0.28)   | 0.020 (w/o 0.013)  |
| INR - at admission (N=199)                    | 0.02 (w/o -0.03)       | 0.768 (w/o 0.780)  | 0.12 (w/o 0.07)   | 0.092 (w/o 0.469)  |
| INR - 7. DOH (N=80)                           | 0.15 (w/o 0.16)        | 0.183 (w/o 0.150)  | 0.25 (w/o 0.26)   | 0.028 (w/o 0.109)  |
| APTT - at admission (N=196)                   | -0.13 (w/o -0.12)      | 0.077 (w/o 0.101)  | -0.12 (w/o -0.11) | 0.091 (w/o 0.128)  |
| APTT - 7. DOH (N=65)                          | 0.09                   | 0.454              | 0.17              | 0.167              |
| Fibrinogen - at admission (N=62)              | -0.08 (w/o 0.04)       | 0.538 (w/o 0.751)  | -0.07 (w/o -0.04) | 0.574 (w/o 0.740)  |
| Fibrinogen - 7. DOH (N=39)                    | 0.15                   | 0.355              | 0.14              | 0.402              |
| LDH - at admission (N=172)                    | 0.37                   | <0.001             | 0.35              | <0.001             |

|                                                               |                   |                   |                   |                   |
|---------------------------------------------------------------|-------------------|-------------------|-------------------|-------------------|
| LDH - 7. DOH (N=46)                                           | 0.36              | 0.014             | 0.41              | 0.005             |
| hs-TnI - at admission (N=153)                                 | 0.39              | <0.001            | 0.33              | <0.001            |
| hs-TnI - 7. DOH (N=40)                                        | 0.55              | <0.001            | 0.56              | <0.001            |
| CK - at admission (N=142)                                     | 0.14              | 0.088             | 0.17              | 0.046             |
| CK - 7. DOH (N=38)                                            | 0.55              | <0.001            | 0.43              | 0.007             |
| CK-MB - at admission (N=124)                                  | 0.22              | 0.014             | 0.21              | 0.017             |
| CK-MB - 7. DOH (N=27)                                         | 0.35              | 0.074             | 0.26              | 0.186             |
| NT-proBNP - at admission (N=142)                              | 0.29              | <0.001            | 0.32              | <0.001            |
| NT-proBNP - 7. DOH (N=42)                                     | 0.48              | 0.001             | 0.39              | 0.010             |
| Myoglobin - at admission (N=15)                               | 0.69              | 0.004             | 0.39              | 0.147             |
| Myoglobin - 7. DOH (N=11)                                     | 0.60              | 0.053             | 0.60              | 0.053             |
| Creatinine - at admission (N=222)                             | 0.22 (w/o 0.18)   | 0.001 (w/o 0.006) | 0.11 (w/o 0.11)   | 0.090 (w/o 0.114) |
| Creatinine - 7. DOH (N=169)                                   | 0.03 (w/o -0.05)  | 0.695 (w/o 0.485) | 0 ( w/o -0.07)    | 0.959 (w/o 0.355) |
| EGFR - at admission to hospital (N=215)                       | -0.24             | <0.001            | -0.1              | 0.132             |
| EGFR - 7. DOH (N=169)                                         | -0.02 (w/o 0.05)  | 0.835 (w/o 0.488) | 0.04 (w/o 0.1)    | 0.598 (w/o 0.204) |
| Urea - at admission (N=209)                                   | 0.28 (w/o 0.24)   | <0.001            | 0.26 (w/o 0.25)   | <0.001            |
| Urea - 7. DOH (N=124)                                         | 0.53 (w/o 0.47)   | <0.001            | 0.56 (w/o 0.52)   | <0.001            |
| ALT - at admission (N=226)                                    | 0 (w/o -0.01)     | 0.978 (w/o 0.836) | 0.01 (w/o 0.02)   | 0.839 (w/o 0.779) |
| ALT - 7. DOH (N=150)                                          | -0.3              | <0.001            | -0.24             | 0.003             |
| AST - at admission (N=219)                                    | 0.13              | 0.057             | 0.09              | 0.203             |
| AST - 7. DOH (N=148)                                          | -0.13             | 0.124             | -0.07             | 0.365             |
| GGT - at admission (N=58)                                     | 0.24              | 0.064             | 0.21              | 0.113             |
| GGT - 7. DOH (N=41)                                           | -0.03             | 0.858             | 0.01              | 0.931             |
| Total bilirubin - at admission (N=165)                        | 0.13              | 0.089             | 0.16              | 0.039             |
| Total bilirubin - 7. DOH (N=63)                               | -0.20             | 0.113             | -0.06             | 0.625             |
| Albumin – at admission (N=26)                                 | -0.42             | 0.032             | -0.44             | 0.025             |
| Total calcium – at admission (N=42)                           | -0.41             | 0.007             | -0.33             | 0.036             |
| Total calcium - 7. DOH (N=34)                                 | -0.51             | 0.002             | -0.49             | 0.004             |
| Vitamin D3 - at admission (N=81)                              | -0.08 (w/o -0.13) | 0.502 (w/o 0.250) | -0.02 (w/o -0.07) | 0.887 (w/o 0.559) |
| Vitamin D3 - 7. DOH (N=6)                                     | -                 | -                 | -0.83             | 0.042             |
| Time from the onset of symptoms to hospital admission (N=229) | -0.14             | 0.034             | -0.10             | 0.441             |
| Maximum flow - HFNO (N=55)                                    | 0.27              | 0.046             | 0.42              | 0.002             |
| Maximum FiO2 – HFNO (N=55)                                    | 0.29              | 0.030             | 0.32              | 0.019             |
| Time from the onset of symptoms to ICU admission (N=31)       | -0.21             | 0.257             | -                 | -                 |

w/o – without outliers. \* - Spearman's correlation.

**Table S7.** The correlations between patients' laboratory parameters (presented as categorical variables) and the need for mechanical ventilation and ICU treatment.

| Parameter                                            |                              | Mechanical ventilation |             |      |          | ICU treatment |             |       |          |
|------------------------------------------------------|------------------------------|------------------------|-------------|------|----------|---------------|-------------|-------|----------|
|                                                      |                              | no                     | yes         | phi  | p        | no            | yes         | phi   | p        |
| WBC - at admission, ranges (N=227)                   | <4.5 ×10 <sup>3</sup> /μL    | 51 (24.88%)            | 3 (13.64%)  | 0.08 | 0.361*   | 50 (25.1%)    | 4 (12.9%)   | 0.1   | 0.192*   |
|                                                      | 4.5-10 ×10 <sup>3</sup> /μL  | 132 (64.39%)           | 7 (31.82%)  | 0.2  | 0.006*   | 125 (63.78%)  | 14 (45.16%) | 0.13  | 0.075*   |
|                                                      | >10 ×10 <sup>3</sup> /μL     | 22 (10.73%)            | 12 (54.55%) | 0.36 | <0.001** | 21 (10.71%)   | 13 (41.94%) | 0.3   | <0.001** |
| WBC – 7. DOH, ranges (N=187)                         | <4.5 ×10 <sup>3</sup> /μL    | 7 (4.17%)              | 0 (0%)      | 0.07 | 1**      | 7 (4.43%)     | 0 (0%)      | 0.08  | 0.598**  |
|                                                      | 4.5-10 ×10 <sup>3</sup> /μL  | 116 (69.05%)           | 6 (31.58%)  | 0.24 | 0.003*   | 109 (68.99%)  | 13 (44.83%) | 0.18  | 0.021*   |
|                                                      | >10 ×10 <sup>3</sup> /μL     | 45 (26.79%)            | 13 (68.42%) | 0.27 | 0.001*   | 42 (26.58%)   | 16 (55.17%) | 0.22  | 0.004*   |
| Neutrophil count - at admission, ranges (N=226)      | <1.9 ×10 <sup>3</sup> /μL    | 13 (6.37%)             | 0 (0%)      | 0.08 | 0.622**  | 13 (6.67%)    | 0 (0%)      | 0.1   | 0.224**  |
|                                                      | 1.9-7 ×10 <sup>3</sup> /μL   | 152 (74.51%)           | 8 (36.36%)  | 0.25 | <0.001*  | 148 (75.9%)   | 12 (38.71%) | 0.28  | <0.001*  |
|                                                      | >7 ×10 <sup>3</sup> /μL      | 39 (19.12%)            | 14 (63.64%) | 0.31 | <0.001*  | 34 (17.44%)   | 19 (61.29%) | 0.36  | <0.001*  |
| Neutrophil count - 7. DOH, ranges (N=186)            | <1.9 ×10 <sup>3</sup> /μL    | 5 (2.99%)              | 0 (0%)      | 0.06 | 1**      | 5 (3.18%)     | 0 (0%)      | 0.07  | 1**      |
|                                                      | 1.9-7 ×10 <sup>3</sup> /μL   | 124 (74.25%)           | 3 (15.79%)  | 0.38 | <0.001*  | 117 (74.53%)  | 10 (34.48%) | 0.31  | <0.001*  |
|                                                      | >7 ×10 <sup>3</sup> /μL      | 38 (22.75%)            | 16 (84.21%) | 0.41 | <0.001*  | 35 (22.29%)   | 19 (65.52%) | 0.35  | <0.001*  |
| Neutrophil percentage - at admission, ranges (N=226) | <40%                         | 1 (0.49%)              | 0 (0%)      | 0.02 | 1**      | 1 (0.51%)     | 0 (0%)      | 0.03  | 1**      |
|                                                      | 40-68%                       | 62 (30.39%)            | 0 (0%)      | 0.2  | 0.005*   | 61 (31.28%)   | 1 (3.23%)   | 0.22  | 0.002*   |
|                                                      | >68%                         | 141 (69.12%)           | 22 (100%)   | 0.2  | 0.005*   | 133 (68.21%)  | 30 (96.77%) | 0.22  | 0.002*   |
| Neutrophil percentage - 7. DOH, ranges (N=186)       | <40%                         | 7 (4.19%)              | 0 (0%)      | 0.07 | 1**      | 7 (4.46%)     | 0 (0%)      | 0.08  | 0.598**  |
|                                                      | 40-68%                       | 108 (64.67%)           | 5 (26.32%)  | 0.24 | 0.003*   | 105 (66.88%)  | 8 (27.59%)  | 0.29  | <0.001*  |
|                                                      | >68%                         | 52 (31.14%)            | 14 (73.68%) | 0.27 | 0.001*   | 45 (28.66%)   | 21 (72.41%) | 0.33  | <0.001*  |
| Lymphocyte count - at admission, ranges (N=226)      | <0.9 ×10 <sup>3</sup> /μL    | 94 (46.08%)            | 9 (40.91%)  | 0.03 | 0.812*   | 87 (44.62%)   | 16 (51.61%) | 0.05  | 0.594*   |
|                                                      | 0.9-5 ×10 <sup>3</sup> /μL   | 110 (53.92%)           | 13 (59.09%) | 0.03 | 0.812*   | 108 (55.38%)  | 15 (48.39%) | -0.05 | 0.594*   |
|                                                      | >5 ×10 <sup>3</sup> /μL      | 0 (0%)                 | 0 (0%)      | -    | -        | 0 (0%)        | 0 (0%)      | -     | -        |
| Lymphocyte count - 7. DOH, ranges (N=186)            | <0.9 ×10 <sup>3</sup> /μL    | 12 (7.19%)             | 7 (36.84%)  | 0.2  | 0.001**  | 11 (7.01%)    | 8 (27.59%)  | 0.25  | 0.038**  |
|                                                      | 0.9-5 ×10 <sup>3</sup> /μL   | 153 (91.62%)           | 12 (63.16%) | 0.27 | 0.002**  | 144 (91.72%)  | 21 (72.41%) | 0.22  | 0.007**  |
|                                                      | >5 ×10 <sup>3</sup> /μL      | 2 (1.2%)               | 0 (0%)      | 0.04 | 1**      | 2 (1.27%)     | 0 (0%)      | 0.04  | 1**      |
| Lymphocyte percentage - at admission, ranges (N=226) | <19%                         | 116 (56.86%)           | 22 (100%)   | 0.26 | <0.001*  | 108 (55.38%)  | 30 (96.77%) | 0.29  | <0.001*  |
|                                                      | 19-48%                       | 87 (42.65%)            | 0 (0%)      | 0.26 | <0.001*  | 86 (44.1%)    | 1 (3.23%)   | 0.29  | <0.001*  |
|                                                      | >48%                         | 1 (0.49%)              | 0 (0%)      | 0.02 | 1**      | 1 (0.51%)     | 0 (0%)      | 0.03  | 1**      |
| Lymphocyte percentage - 7. DOH, ranges (N=186)       | <19%                         | 47 (28.14%)            | 17 (89.47%) | 0.39 | <0.001*  | 40 (25.48%)   | 24 (82.76%) | 0.44  | <0.001*  |
|                                                      | 19-48%                       | 116 (69.46%)           | 2 (10.53%)  | 0.37 | <0.001*  | 113 (71.97%)  | 5 (17.24%)  | 0.41  | <0.001*  |
|                                                      | >48%                         | 4 (2.4%)               | 0 (0%)      | 0.05 | 1**      | 4 (2.55%)     | 0 (0%)      | 0.06  | 1**      |
| NLR ≥2 - at admission (N=226)                        |                              | 184 (90.2%)            | 22 (100%)   | 0.1  | 0.231**  | 176 (90.26%)  | 30 (96.77%) | 0.08  | 0.324**  |
| NLR ≥2- 7. DOH (N=186)                               |                              | 99 (59.28%)            | 19 (100%)   | 0.26 | 0.001*   | 90 (57.32%)   | 28 (96.55%) | 0.30  | <0.001*  |
| PLT - at admission, ranges (N=227)                   | <150 ×10 <sup>3</sup> /μL    | 40 (19.51%)            | 1 (4.55%)   | 0.12 | 0.139**  | 41 (20.92%)   | 0 (0%)      | 0.19  | 0.010*   |
|                                                      | 150-400 ×10 <sup>3</sup> /μL | 155 (75.61%)           | 16 (72.73%) | 0.02 | 0.970*   | 147 (75%)     | 24 (77.42%) | 0.02  | 0.947*   |
|                                                      | >400 ×10 <sup>3</sup> /μL    | 10 (4.88%)             | 5 (22.73%)  | 0.21 | 0.008**  | 8 (4.08%)     | 7 (22.58%)  | 0.26  | 0.001**  |
| PLT – 7. DOH, ranges (N=187)                         | <150 ×10 <sup>3</sup> /μL    | 1 (0.6%)               | 1 (5.26%)   | 0.14 | 0.193**  | 1 (0.63%)     | 1 (3.45%)   | 0.1   | 0.287**  |
|                                                      | 150-400 ×10 <sup>3</sup> /μL | 85 (50.6%)             | 8 (42.11%)  | 0.05 | 0.646*   | 80 (50.63%)   | 13 (44.83%) | 0.04  | 0.709*   |
|                                                      | >400 ×10 <sup>3</sup> /μL    | 82 (48.81%)            | 10 (52.63%) | 0.02 | 0.941*   | 77 (48.73%)   | 15 (51.72%) | 0.02  | 0.925*   |
| CRP>100 mg/L – at admission (N=222)                  |                              | 66 (32.84%)            | 16 (76.19%) | 0.26 | <0.001   | 61 (31.94%)   | 21 (67.75%) | 0.26  | <0.001   |
| CRP>100 mg/L – 7. DOH (N=181)                        |                              | 2 (1.24%)              | 7 (35%)     | 0.49 | <0.001   | 2 (1.32%)     | 7 (24.14%)  | 0.39  | <0.001   |
| PCT > 0.5 ng/mL – at admission (N=205)               |                              | 12 (6.56%)             | 10 (45.45%) | 0.39 | <0.001** | 11 (6.32%)    | 11 (35.48%) | 0.34  | <0.001** |
| PCT > 0.5 ng/mL – 7. DOH (N=102)                     |                              | 3 (3.57%)              | 7 (38.89%)  | 0.45 | <0.001** | 2 (2.63%)     | 8 (30.77%)  | 0.41  | <0.001** |
| D-Dimer > 500 μg/L FEU - at admission; (N=206)       |                              | 133 (71.89%)           | 21 (100%)   | 0.20 | 0.003**  | 125 (71.02%)  | 29 (96.67%) | 0.21  | 0.001**  |
| D-Dimer > 500 μg/L FEU – 7. DOH; (N=150)             |                              | 101 (77.69%)           | 20 (13.33%) | 0.19 | 0.014**  | 93 (76.23%)   | 28 (100%)   | 0.23  | 0.002**  |
| LDH >500 U/L – at admission (N=172)                  |                              | 41 (26.11%)            | 13 (86.67%) | 0.37 | <0.001** | 37 (24.5%)    | 17 (80.95%) | 0.40  | <0.001** |
| LDH >500 U/L – 7. DOH (N=46)                         |                              | 8 (19.05%)             | 2 (50%)     | 0.21 | 0.201**  | 6 (15.79%)    | 4 (50%)     | 0.31  | 0.055**  |

\* chi-squared test with Yates' correction; \*\* Fisher's exact test; All variables are presented as N (%).



**Table S8.** Univariate logistic regression analysis of COVID-19 symptoms for the prediction of death, mechanical ventilation and ICU treatment.

| Symptom                  | death |           |       | MV   |            |        | ICU treatment |           |       |
|--------------------------|-------|-----------|-------|------|------------|--------|---------------|-----------|-------|
|                          | OR    | 95%CI     | p     | OR   | 95%CI      | p      | OR            | 95%CI     | p     |
| Dyspnoea                 | 1.39  | 0.17-11.1 | 0.202 | 2    | 0.25-15.75 | 0.510  | 1.36          | 0.3-6.21  | 0.690 |
| Fever                    | 0.25  | 0.09-0.75 | 0.013 | 0.2  | 0.08-0.51  | <0.001 | 0.29          | 0.12-0.69 | 0.005 |
| Cough                    | 0.25  | 0.09-0.75 | 0.013 | 0.32 | 0.12-0.86  | 0.024  | 0.35          | 0.15-0.85 | 0.021 |
| Fatigue                  | 0.57  | 0.2-1.59  | 0.281 | 0.49 | 0.2-1.2    | 0.120  | 0.58          | 0.27-1.25 | 0.164 |
| Dairrhoea                | 0.29  | 0.04-2.25 | 0.235 | 0.2  | 0.03-1.53  | 0.200  | 0.13          | 0.02-1    | 0.049 |
| Nausea or vomiting       | 0.48  | 0.06-3.78 | 0.486 | 0.73 | 0.16-3.3   | 0.681  | 0.22          | 0.03-1.69 | 0.145 |
| Myalgia                  | 0.33  | 0.07-1.47 | 0.145 | 0.35 | 0.1-1.24   | 0.103  | 0.54          | 0.21-1.38 | 0.198 |
| Sore throat              | 0.77  | 0.1-6.18  | 0.805 | 1.19 | 0.26-5.57  | 0.822  | 0.78          | 0.17-3.59 | 0.755 |
| Headache                 | 0.28  | 0.04-2.18 | 0.224 | 0.19 | 0.03-1.48  | 0.113  | 0.44          | 0.13-1.51 | 0.191 |
| Smell or taste disorders | 0.6   | 0.13-2.74 | 0.509 | 0.66 | 0.19-2.34  | 0.519  | 1             | 0.36-2.79 | 0.996 |
| Smell disorders          | 0.72  | 0.16-3.34 | 0.681 | 0.8  | 0.23-2.87  | 0.736  | 1             | 0.36-2.79 | 0.996 |
| Taste disorders          | 0.72  | 0.16-3.34 | 0.681 | 0.8  | 0.23-2.87  | 0.736  | 0.81          | 0.29-2.25 | 0.685 |
